1 **A protracted cholera outbreak in Nairobi City County associated with mass gathering**  
2 **events, Kenya, 2017**

3 **Author list**

4 *Philip Ngere<sup>1,2\*</sup>, Daniel Langat<sup>2</sup>, Isaac Ngere<sup>1</sup>, Jeanette Dawa<sup>1</sup>, Emmanuel Okunga<sup>2</sup>, Carolyn*  
5 *Nasimiyu<sup>1</sup>, Catherine Kiama<sup>1</sup>, Peter Lokamar<sup>3</sup>, Carol Ngunu<sup>4</sup>, Lyndah Makayotto<sup>2</sup>, M. Kariuki*  
6 *Njenga<sup>1,5</sup>, Eric Osoro<sup>1,5</sup>*

7 **Author affiliations**

8 <sup>1</sup>Washington State University Global Health Program, Kenya

9 <sup>2</sup>Division of Disease Surveillance and Response, Ministry of Health, Kenya

10 <sup>3</sup>National Public Health Laboratory Services, Ministry of Health, Kenya

11 <sup>4</sup>Department of Health Services, Nairobi City County Government, Kenya

12 <sup>5</sup>Paul G Allen School for Global Health, Washington State University, Pullman, USA

13 \*Corresponding author [philip.ngere@wsu.edu](mailto:philip.ngere@wsu.edu) (PN)

14 **Abstract**

15 Cholera continues to cause many outbreaks in low and middle-income countries due to inadequate  
16 water, sanitation, and hygiene services. We describe a protracted cholera outbreak in Nairobi City  
17 County (NCC), Kenya in 2017. We reviewed the cholera outbreak line lists from NCC in 2017 to  
18 determine its extent and factors associated with death. A suspected case of cholera was any  
19 person aged >2 years old who had acute watery diarrhea, nausea, or vomiting, whereas a  
20 confirmed case was where *Vibrio cholerae* was isolated from the stool specimen. We summarized

21 NOTE: This preprint reports new research that has not been certified by peer review and should not be used to guide clinical practice.  
cases using for continuous variables and proportions for categorical variables. Associations

22 between admission status, sex, age, residence, time to care seeking, and outbreak settings; and  
23 cholera associated deaths were assessed using odds ratio (OR) with 95% confidence interval (CI).  
24 Of the 2,737 cholera cases reported, we analyzed 2,347 (85.7%) cases including 1,364 (58.1%)  
25 outpatients, 1,724 (73.5%) not associated with mass gathering events (MGEs), 1,356 (57.8%)  
26 male and 2,202 (93.8%) aged  $\geq 5$  years, and 35 deaths (case fatality rate: 1.5%). Cases were  
27 reported from all the Sub Counties of NCC with an overall county attack rate of 50 per 100,000  
28 people. *Vibrio cholerae* Ogawa serotype was isolated from 78 (34.8%) of the 224 specimens  
29 tested and all isolates were sensitive to tetracycline and levofloxacin but resistant to amikacin.  
30 The odds of cholera-related deaths was lower among outpatient cases (aOR: 0.35; [95% CI: 0.17-  
31 0.72]), age  $\geq 5$  years old (aOR: 0.21 [95% CI: 0.09-0.55]), and MGEs (aOR: 0.26 [95% CI: 0.07-  
32 0.91]) while threefold higher odds among male (aOR: 3.04 [95% CI: 1.30-7.13]). NCC  
33 experienced a protracted and widespread cholera outbreak with a high case fatality rate in 2017.

#### 34 **Author Summary**

35 Cholera outbreaks are common in Kenya. The highest number of cases were reported in 2015  
36 with 10,536 cases across the country. The subsequent three years also recorded a high number  
37 of cholera cases with 6,137 cases in 2016, 4,217 cases in 2017, and 5,638 cases in 2018. During  
38 the four years (2015-2018), NCC contributed less than 20.0% of the cholera cases, except in  
39 2017 when the county reported 56.9% (2,737) of the cases. In this study, we sought to describe  
40 the burden of cholera in NCC during the 2017 outbreak. We reviewed the cholera outbreak data  
41 from NCC in 2017 to determine its extent and risk factors for cholera-related deaths. The  
42 findings depict a prolonged and widespread cholera outbreak with the likelihood of death higher  
43 among male cases but lower among outpatients, cases aged  $\geq 5$  years old, and cases from the  
44 MGEs. More studies on the factors associated with cholera-related deaths are necessary to  
45 inform public health response.

## 46 **Introduction**

47 Cholera, an acute watery diarrheal (AWD) disease, poses a significant threat to public health  
48 worldwide. With a potential fatality rate of up to 5% in untreated cases, cholera remains a public  
49 health concern, requiring comprehensive research and evidence-based interventions [1]. The  
50 causative agent, *Vibrio cholerae*, is transmitted through the feco-oral route, either directly from  
51 person-to-person or through contaminated fluids, food, flies, and fomites [2]. Cholera outbreaks  
52 are intrinsically linked to poor water, sanitation, and hygiene (WASH) indicators, affecting both  
53 households and communities [4]. Notably, densely populated areas such as informal settlements,  
54 displaced persons' camps, and mass gathering events (MGEs) serve as hotspots for cholera  
55 transmission due to heightened person-to-person interactions and increased strain on WASH  
56 facilities [5,6].

57 Globally, cholera continues to exact a heavy toll, with an estimated 1.3 billion people at risk and  
58 millions of cases and tens of thousands of deaths reported each year [7]. Sub-Saharan Africa  
59 shoulders the greatest burden of cholera, accounting for up to 83% of deaths reported between  
60 2000 and 2015 [8]. Kenya, situated in this high-risk region, has experienced a fluctuating cholera  
61 epidemiology, with endemicity influenced by varying WASH indices. The country's commitment  
62 to ending cholera by 2030, as supported at the 71<sup>st</sup> World Health Assembly in 2018, highlights  
63 the urgency in addressing this persistent health challenge.

64 Kenya's experience with cholera dates to its first detection in 1971, with large outbreaks in 1997-  
65 1999 and 2007-2010. Subsequently, cases declined in 2011-2014, only to re-emerge in 2015  
66 [9,10]. Presently, cholera in Kenya is endemic and is characterized by regional disparities in  
67 disease incidence [14]. Nairobi City County (NCC), the country's capital, has played a significant  
68 role in this epidemiological landscape. In 2015, Kenya recorded its highest annual cholera case  
69 count, with 10,536 cases reported nationwide, including 1,845 (17.5%) cases within NCC. In the

70 subsequent three years (2016-2018), Kenya consistently reported high cholera caseloads,  
71 exceeding 4,000 cases annually, with 2017 marking a surge in NCC, contributing to 2,737  
72 (64.9%) of the reported 4,217 cases countywide. Here we characterize the 2017 cholera outbreak  
73 in NCC and identify risk factors associated with mortality.

## 74 **Methods**

### 75 **Study design**

76 We conducted a cross-sectional study of the cholera outbreak from Nairobi City County, Kenya,  
77 between 1<sup>st</sup> January to 31<sup>st</sup> December 2017.

### 78 **Study area**

79 The study was conducted in Nairobi City County (NCC), the capital city of and one of 47 counties  
80 in Kenya. As of 2017, NCC had a population of 4,697,274 with a population density of 6,949  
81 persons per square kilometer [13]. NCC comprises 17 administrative units (sub-counties) and is  
82 characterized by diverse settings, including formal settlements and informal settlements. Over  
83 60% of NCC's population resides in informal settlements, which occupy only 6% of the land area  
84 [16].

### 85 **Cholera outbreak detection**

86 Cholera cases were defined based on Kenya's Integrated Diseases Surveillance and Response  
87 (IDSR) technical guidelines. A suspected case of cholera was defined as any person aged two  
88 years or older who presented with AWD during the outbreak period. A confirmed case was any  
89 suspected case from whose stool or rectal swab specimens *Vibrio cholerae* was isolated. Any  
90 suspected case that was epidemiologically linked to a confirmed case or from whose stool or  
91 rectal swab specimens test by a rapid diagnostic test turned positive for *Vibrio cholerae* was  
92 considered a probable case [16]. Upon confirmation of a cholera outbreak (one confirmed case),

93 probable cases were treated as confirmed cases but underwent weekly random sampling and  
94 testing to confirm continuity of the outbreak and monitor the *Vibrio cholerae* strains [17].

## 95 **Data source**

96 The data for this study were sourced from cholera outbreak line lists for NCC, collected by the  
97 NCC public health surveillance officers during the outbreak period. These line lists are  
98 comprehensive records of cholera cases, including variables such as age, sex, admission status,  
99 outbreak settings (including MGEs), dates of hospital visits, dates of symptom onset, disease  
100 outcomes, pathogen strains, and antimicrobial susceptibility test results. A mass gathering event  
101 (MGE) was a function attended by many people that could strain the health systems beyond the  
102 capacity provided e.g., sporting, religious, and cultural events activities. The confirmatory stool  
103 or rectal swab specimens collected from suspected cases to confirm the cause of the AWD were  
104 transported in Cary-Blair transport media to the National Public Health Laboratories (NPHL) and  
105 plated on thiosulfate-citrate-bile salts agar (TCBS). The resultant colonies were evaluated using  
106 biochemical reactions and serotyped using commercial antisera. Colonies were also tested for  
107 antimicrobial susceptibility using disk diffusion method.

## 108 **Data analysis**

109 All cases listed in the cholera outbreak line lists for NCC between January 1, and December 31,  
110 2017, were included. To prepare the data for analysis, a thorough data cleaning process was  
111 undertaken to address inconsistent data formats, repeated entries, and missing or inconsistent data  
112 points using Microsoft Excel. Data was analyzed in Epi Info statistical software. Summary tables  
113 with means for continuous variables and proportions for categorical variables were generated.  
114 Attack rate (AR) was the number of reported cholera cases per 100,000 population. Case fatality  
115 rate (CFR) was the percentage of deaths among all cases. The antimicrobial susceptibility tests  
116 results were summarized as proportions and presented using stacked bar charts.

117 In the bivariate analysis, the association between several variables (admission status, sex, age,  
118 residence, time to care seeking, and outbreak setting) and cholera-related death was assessed and  
119 crude odds ratios (cOR) with 95% confidence intervals (CI) presented. Variables with  $p \leq 0.20$   
120 were included in an unconditional multivariable logistic regression model using the backward  
121 elimination method and the adjusted ORs reported. Statistical significance was set at  $p < 0.05$ .

## 122 **Ethical considerations**

123 Approval to access the line list data was sought from the Kenya Ministry of Health's Division of  
124 Disease Surveillance and Response. The study used de-identified data that had been collected  
125 during outbreak response activities and therefore informed consent was not sought.

## 126 **Results**

127 From an initial line list of 2,737 from Nairobi City County, we analyzed 2,347 cases after  
128 excluding 339 (14.1%) due to misclassified dates, 36 (1.5%) duplicates, and 15 (0.6%) incomplete  
129 records. The median age of cases was 31.0 years, ranging from 0.5 to 86 years. Many cases  
130 (93.8%) were aged  $\geq 5$  years, with 80.4% falling within the working age group of 21-65 years. Of  
131 the cases, 57.8% were male, and 58.1% were outpatients while 26.5% of cases were linked to  
132 MGEs. The overall case fatality rate (CFR) was 1.5%, with higher rates observed in children  $< 5$   
133 years old (4.8%), cases from other counties (2.6%), and inpatients (2.3%) (**Table 1**)

134

135

136

137

**Table 1: Distribution of mortalities from cholera in Nairobi City County, Kenya in 2017**

| Variable                    | All cases    |              | Deaths    |              | CFR (%)    |
|-----------------------------|--------------|--------------|-----------|--------------|------------|
|                             | n            | %            | n         | %            |            |
| <b>Admission status</b>     |              |              |           |              |            |
| Outpatient                  | 1,364        | 58.1         | 12        | 34.3         | 0.9        |
| Inpatient                   | 983          | 41.9         | 23        | 65.7         | 2.3        |
| <b>Sex</b>                  |              |              |           |              |            |
| Male                        | 1,356        | 57.8         | 28        | 80.0         | 2.1        |
| Female                      | 991          | 42.2         | 7         | 20.0         | 0.7        |
| <b>Age (years)</b>          |              |              |           |              |            |
| <5                          | 145          | 6.2          | 7         | 20.0         | 2.1        |
| ≥5                          | 2202         | 93.8         | 28        | 80.0         | 0.9        |
| <b>Residence</b>            |              |              |           |              |            |
| Other Counties              | 231          | 9.8          | 6         | 17.1         | 2.6        |
| Nairobi County              | 2,116        | 90.2         | 29        | 82.9         | 1.4        |
| <b>Care seeking (hours)</b> |              |              |           |              |            |
| ≥ 24                        | 1,576        | 67.1         | 24        | 68.6         | 1.5        |
| < 24                        | 771          | 32.9         | 11        | 31.4         | 1.4        |
| <b>Outbreak setting</b>     |              |              |           |              |            |
| Mass gatherings events      | 623          | 26.5         | 3         | 8.6          | 0.5        |
| Non-mass gathering events   | 1,724        | 73.5         | 32        | 91.4         | 1.9        |
| <b>Total (NCC)</b>          | <b>2,347</b> | <b>100.0</b> | <b>35</b> | <b>100.0</b> | <b>1.5</b> |

138

139 Cholera cases were reported during 41 (78.8%) of 52 epidemiological weeks. Continuous

140 reporting of cases was observed from epidemiological week 14 through to week 48. An increase

141 in the number of cases was evident between weeks 28 and 45. Two distinct peaks were identified  
 142 during weeks 29-30 and weeks 35-36, which were attributed to events with MGEs. A MGE was  
 143 associated with a large increase in cases during week 25 (**Figure 1**).

144

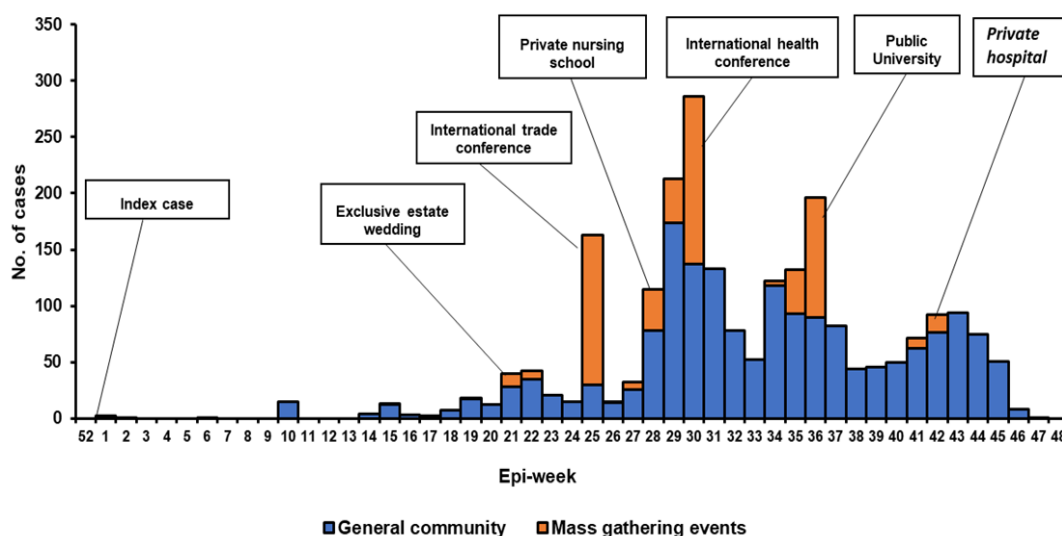

145

146 **Figure 1: Epi-curve of cholera cases reported by week in Nairobi City County, Kenya, 2017**

147 All the sub counties in NCC reported cholera cases with an overall county AR (cases per 100,000  
 148 population) of 50.0. Three sub counties recorded ARs of  $\geq 100$ : Embakasi East (243.4), Embakasi  
 149 West (102.7), and Langata (100.0) while those with the highest CFRs were Mathare (7.1%),  
 150 Embakasi North (5.9%), and Kasarani (4.0%) (**Figure 2**).

151



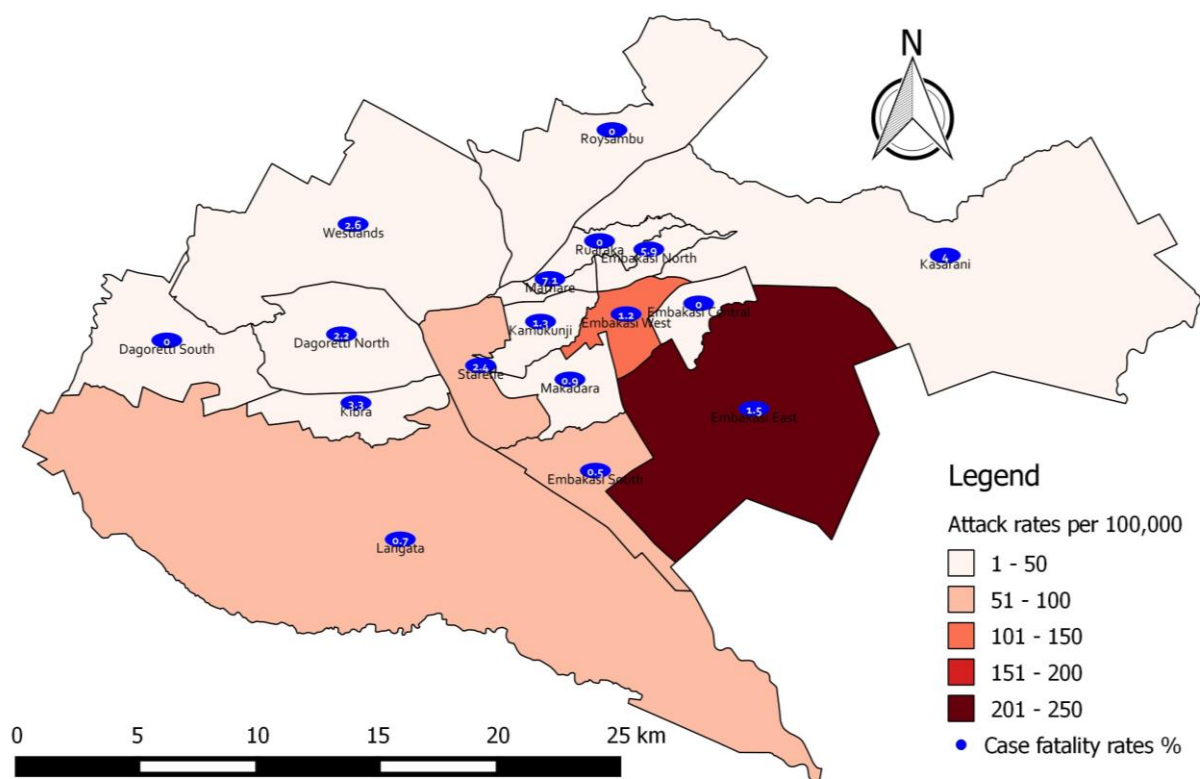

152

153 **Figure 2: Cholera attack rate per 100,000 population and case fatality rates (%) by Sub**

154 **Counties in Nairobi City County, 2017**

155

156 Of the 224 rectal swab or stool samples that underwent culture and serotyping, *Vibrio cholerae*

157 of the Ogawa serotype was identified in 78 (34.8%). All the isolates were sensitive to tetracycline

158 and levofloxacin but resistant to amikacin (**Figure 3**).

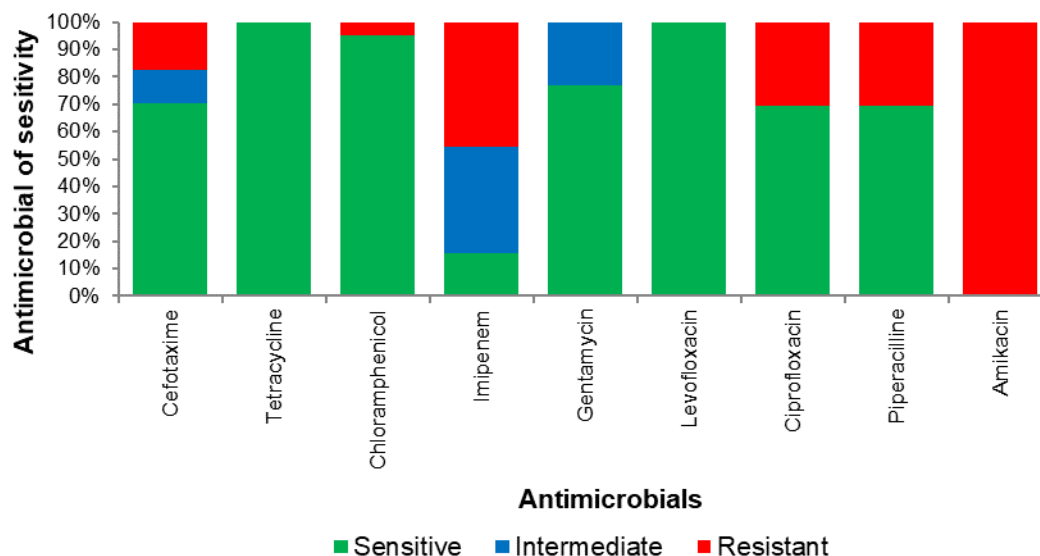

159

160 *Figure 3: Levels of Vibrio cholerae antimicrobial sensitivity by type of antimicrobial from*  
 161 *Nairobi City County, 2017*

162 On bivariate analysis, the odds of a cholera-related death was higher among male (cOR: 2.83  
 163 [95% CI: 1.21-6.62]). There was 63% lower odds of cholera-related deaths among outpatients  
 164 compared to inpatients (cOR: 0.37 [95% CI: 0.18-0.76]). Other factors associated with lower odds  
 165 included being aged <5 years old (cOR: 0.24 [95% CI: 0.10-0.58]), seeking medical attention  
 166 within the 24 hours of symptom onset (cOR: 0.61 [95% CI: 0.28-1.33]), and cases linked to MGEs  
 167 (cOR: 0.20 [95% CI: 0.05-0.75]) (**Table 2**). In the multivariable logistic regression analysis,  
 168 factors that were independently associated with lower odds of cholera associated cholera-related  
 169 deaths included outpatient cases (adjusted Odds Ratio [aOR]: 0.35; 95% CI: 0.17-0.72), age  $\geq$ 5  
 170 years olds (aOR: 0.21 [95% CI: 0.09-0.55]), and linkage to MGEs (aOR: 0.26 [95% CI: 0.07-  
 171 0.91]). Conversely, male had threefold higher odds of cholera-related death (aOR: 3.04 [95% CI:  
 172 1.30-7.13]) (**Table 2**).

173

174

175

**Table 2: Factors associated with cholera deaths in Nairobi City County, Kenya in 2017**

| Variable                   | Bivariable analysis |         | Multivariable analysis |         |
|----------------------------|---------------------|---------|------------------------|---------|
|                            | cOR (95% CI)        | p-Value | aOR (95% CI)           | p-Value |
| Admission status           |                     |         |                        |         |
| Outpatient                 | 0.37 (0.18-0.76)    | 0.007   | 0.35 (0.17-0.72)       | 0.004   |
| Inpatient                  | Ref                 |         | Ref                    |         |
| Sex                        |                     |         |                        |         |
| Male                       | 2.83 (1.21-6.62)    | 0.017   | 3.04 (1.30-7.13)       | 0.010   |
| Female                     | Ref                 |         | Ref                    |         |
| Age (years)                |                     |         |                        |         |
| ≥ 5                        | 0.24 (0.10-0.58)    | 0.001   | 0.21 (0.09-0.55)       | 0.001   |
| < 5                        | Ref                 |         | Ref                    |         |
| Residence                  |                     |         |                        |         |
| Other Counties             | 2.16 (0.81-5.73)    | 0.123   | 2.35 (0.90-6.13)       | 0.080   |
| Nairobi County             | Ref                 |         | Ref                    |         |
| Care seeking (hours)       |                     |         |                        |         |
| ≥ 24                       | 0.61 (0.28-1.33)    | 0.213   | 0.56 (0.26-1.21)       | 0.142   |
| < 24                       | Ref                 |         | Ref                    |         |
| Outbreak setting           |                     |         |                        |         |
| Mass gatherings events     | 0.20 (0.05-0.75)    | 0.017   | 0.26 (0.07-0.91)       | 0.035   |
| Non-mass gatherings events | Ref                 |         | Ref                    |         |

cOR - crude Odds Ratio; aOR - adjusted Odds Ratio

176

## 177 **Discussion**

178 In 2017, Nairobi City County (NCC) experienced a large cholera outbreak which was protracted  
179 and widespread with a propagated transmission pattern accentuated by point source outbreaks  
180 during mass gathering events (MGEs). This substantially contributed to Kenya's cholera cases  
181 which can be attributed to NCC's vast informal settlements which are characterized by poor  
182 WASH indicators and overcrowding that are known drivers of cholera outbreaks [18]. The influx  
183 of refugees escaping from designated camps in northern Kenya due to security threats; inadequate  
184 education and medical services; limited livelihood opportunities; and harsh climatic conditions  
185 together with the increase in the day-population due to migrant workers may have further  
186 exacerbated the situation [19,20]. These dynamics, coupled with spillovers of cases from  
187 neighboring counties with cholera outbreaks in search of care, likely sustained the protracted  
188 nature of this outbreak.

189 The outbreak had an overall case fatality rate (CFR) higher than the <1.0% stipulated by WHO  
190 with timely and appropriate management [21]. Specific demographics and settings exhibited even  
191 higher CFRs. The identified risk factors for cholera-related mortalities included being male,  
192 inpatient status, age <5 years old, and non-MGE linked settings. Whereas the high CFR among  
193 inpatient cases observed in this study is indicative of potential gaps in case management,  
194 demonstrated delays in care seeking may have contributed to worsening the disease outcomes  
195 [22,23]. The gender and age variations in cholera cases observed in this study can be attributed  
196 to societal gender roles. Majority of cases were male contrary to previous studies [24,25]. While  
197 cholera infection has no sex predilection, female sex has been shown in other studies to be  
198 disproportionately more affected during cholera outbreaks. The higher numbers of male cases  
199 reported in this cholera outbreaks may be attributed to transmission occurring mostly out of the  
200 households. This is further reaffirmed by the high transmission within the age group 21-65 years  
201 as opposed to the young ( ages <5 years) and elderly (ages >65 years) suggestive of work settings

202 transmission [26,27]. The high CFRs among male cases is consistent with other studies that have  
203 demonstrated female sex as protective against unfavorable cholera outcomes [26,27]. This has  
204 been attributed to men seeking healthcare late and less often [28]. This study also concurred with  
205 previous observations of high cholera CFRs among children [29,30].

206 The sub counties that are hosts to major informal settlements in NCC such as Mathare, Embakasi  
207 North, Kasarani, Kibra, Starehe, and Dagoreti North registered highest CFRs. The disparities in  
208 CFRs across sub counties and settings underscore the influence of socio-economic factors,  
209 WASH infrastructure, and health services accessibility on cholera outcomes [31]. Typically, few  
210 cholera outbreaks would be expected within formal settlements with good sanitation and safe  
211 water [32]. Interestingly, this study observed explosive point source outbreaks linked to MGEs  
212 within formal settlements. This paradox can be explained by the introduction of infection to the  
213 institutions or MGEs through the practice of outsourcing ready-to-eat foods and drinks that are  
214 likely contaminated or contamination of institutional foods by infected food handlers, cross  
215 contamination from infected residents or guests [33]. Hypothetically, access to good sanitation  
216 and safe water in these settings implies that the population has minimal or no exposures to *Vibrio*  
217 *cholerae* hence low level or no immunity against cholera. In the absence of any routine cholera  
218 vaccination, a spill over into this population would then lead to explosive point source outbreaks  
219 [34,35]. These explosive point source outbreaks linked to the MGEs, however, did not register  
220 commensurate CFRs possibly due to better WASH and access to health services within the formal  
221 settlements.

222 Cholera outbreaks have been shown to coincide with onset of rainfall [36]. The cholera outbreaks  
223 in Nairobi City County in 2017 presented major peaks in epi-weeks 25, 30, and 36; a deviation  
224 from the rainfall peaks expected from March to May (epi-weeks 9-22) and October to December  
225 (epi-weeks 40-52) [37]. The peaking pattern of cholera cases as noted in this study could be  
226 attributed to explosive point source outbreaks during the MGEs in formal settlements between

227 epi-weeks 22 and 36.

228 The isolation of *Vibrio cholerae* of the Ogawa serotype and its antimicrobial susceptibility  
229 patterns align with previous observations and have implications for treatment strategies [38].  
230 However, the emerging resistance to second-line antimicrobials presents a potential challenge for  
231 cholera control [39]. Whereas this study shows complete susceptibility to tetracycline which is a  
232 first line drug used in treatment and newer fluoroquinolones, widespread resistance is exhibited  
233 to ciprofloxacin, a commonly used second line drug alongside third generation cephalosporins,  
234 *b*-Lactam penicillins and aminoglycosides. This presents a possible emerging challenge to the  
235 control of cholera outbreak as witnessed in other settings [40].

## 236 **Limitations**

237 A limitation of study was the reliance on reported outbreak data, which might not capture the  
238 actual cholera burden. Additionally, the calculated attack rates, based on census reports, might  
239 underestimate the actual population at risk, given the city's dynamic day-population.

## 240 **Conclusions**

241 The 2017 cholera outbreak in NCC was marked by protracted and widespread transmission,  
242 predominantly within informal settlements, with sporadic explosive outbreaks during MGEs. The  
243 outbreak underscores the need for a multifaceted approach to cholera control. Enhanced  
244 surveillance, especially during mass gathering events, is paramount. Addressing the challenges  
245 unique to informal settlements, such as improving water, sanitation, and hygiene facilities, is  
246 crucial. Public health campaigns should prioritize raising cholera awareness in high-risk areas to  
247 promote early detection and treatment. Given the potential for spillovers from neighboring  
248 counties, a coordinated inter-county response is essential. Lastly, further research into the specific  
249 factors driving cholera transmission during such outbreaks can provide actionable insights for

250 future prevention measures.

### 251 **Competing interests' statement**

252 The authors declare that they have no competing interests.

### 253 **Authors' contributions**

254 PN, DL, IN, JD, EO, CN, CK, PL, CN, cleaned, merged, and coded the line lists under the  
255 guidance of LM, MKN, and EO. All authors participated in data analysis and report writing. PN  
256 drafted the manuscript with input from all the authors. All the authors have reviewed and  
257 approved the final version of the manuscript.

### 258 **Ethics statement**

259 Ethical review and approval were waived for this analysis based on retrospective data.

### 260 **Data availability statement**

261 All the data underlying the findings described are available within the manuscript.

### 262 **Acknowledgements**

263 We acknowledge the Ministry of Health, Kenya, and the Nairobi City County Government  
264 for providing access to the cholera outbreak line lists used in this study, authorizing the  
265 study, and allowing its publication.

### 266 **Disclaimer**

267 The conclusions reached in this paper are for the authors and do not necessarily represent  
268 the position of the Ministry of Health, Kenya.

## 269 **References**

- 270 1. Jahan S. Significance, Prevention and Control of Food Related Diseases. Makun H,  
271 editor. Vol. 1, Intech open. London; 2016. 145–138 p.
- 272 2. Jutla A, Whitcombe E, Hasan N, Haley B, Akanda A, Huq A, et al. Environmental  
273 factors influencing epidemic cholera. *Am J Trop Med Hyg.* 2013;89(3):597–607.
- 274 3. Azman AS, Rudolph KE, Cummings DAT, Lessler J. The incubation period of cholera: a  
275 systematic review. *J Infect.* 2013;66(5):432–8.
- 276 4. Ali M, Nelson AR, Lopez AL, Sack DA. Updated global burden of cholera in endemic  
277 countries. *PLoS Negl Trop Dis.* 2015;9(6):1–13.
- 278 5. Memish ZA, Steffen R, White P, Dar O, Azhar EI, Sharma A, et al. Mass gatherings  
279 medicine: public health issues arising from mass gathering religious and sporting events.  
280 *Lancet* [Internet]. 2019;393(10185):2073–84. Available from:  
281 [http://dx.doi.org/10.1016/S0140-6736\(19\)30501-X](http://dx.doi.org/10.1016/S0140-6736(19)30501-X)
- 282 6. Memish ZA, Zumla A, McCloskey B, Heymann D, Al Rabeeah AA, Barbeschi M, et al.  
283 Mass gatherings medicine: International cooperation and progress. *Lancet.*  
284 2014;383(9934):2030–2.
- 285 7. Chowdhury FR, Nur Z, Hassan N, Seidlein L, Dunachie S. Pandemics, pathogenicity and  
286 changing molecular epidemiology of cholera in the era of global warming. *Ann Clin*  
287 *Microbiol Antimicrob.* 2017;16(1):1–6.
- 288 8. Lessler J, Moore SM, Luquero FJ, Mckay HS, Grais R, Henkens M, et al. Mapping the  
289 burden of cholera in sub-Saharan Africa and implications for control : an analysis of data  
290 across geographical scales. *Lancet* [Internet]. 2018;391(10133):1908–15. Available from:



- 291 [http://dx.doi.org/10.1016/S0140-6736\(17\)33050-7](http://dx.doi.org/10.1016/S0140-6736(17)33050-7)
- 292 9. Cowman G, Otipo S, Njeru I, Achia T, Thirumurthy H, Bartram J, et al. The re-  
293 emergence of cholera in Kenya. 1997 [cited 2022 Jan 7]; Available from:  
294 <http://www.panafrican-med-journal.com/content/article/28/101/full/>
- 295 10. Cowman G, Otipo S, Njeru I, Achia T, Thirumurthy H, Bartram J, et al. Factors  
296 associated with cholera in Kenya, 2008-2013. *Pan Afr Med J* [Internet]. 2017 Sep 21  
297 [cited 2022 Jan 7];28(1):156. Available from:  
298 <https://www.ajol.info/index.php/pamj/article/view/167358>
- 299 11. Mutonga D, Langat D, Mwangi D, Tonui J, Njeru M, Abade A, et al. National  
300 Surveillance Data on the Epidemiology of Cholera in Kenya, 1997–2010. *J Infect Dis*  
301 [Internet]. 2013 Nov 1 [cited 2022 Aug 15];208(suppl\_1):S55–61. Available from:  
302 [https://academic.oup.com/jid/article/208/suppl\\_1/S55/832321](https://academic.oup.com/jid/article/208/suppl_1/S55/832321)
- 303 12. Stoltzfus JD, Carter JY, Akpınar-Elci M, Matu M, Kimotho V, Giganti MJ, et al.  
304 Interaction between climatic, environmental, and demographic factors on cholera  
305 outbreaks in Kenya. *Infect Dis Poverty* [Internet]. 2014 Oct 1 [cited 2022 Aug  
306 15];3(1):1–9. Available from:  
307 <https://idpjournal.biomedcentral.com/articles/10.1186/2049-9957-3-37>
- 308 13. County Government of Nairobi. County Integrated Development Plan (CIDP) 2018-  
309 2022. 2018.
- 310 14. Ren H, Guo W, Zhang Z, Kisovi LM, Das P. Population density and spatial patterns of  
311 informal settlements in Nairobi, Kenya. *Sustain*. 2020;12(18).
- 312 15. Nairobi City County. County Integrated Development Plan (CIDP) 2018-2022. 2018.

- 313 16. Keddy KH, Sooka A, Parsons MB, Njanpop-Lafourcade BM, Fitchet K, Smith AM.  
314 Diagnosis of *Vibrio cholerae* O1 Infection in Africa. *J Infect Dis* [Internet]. 2013 Nov 1  
315 [cited 2023 Feb 13];208(suppl\_1):S23–31. Available from:  
316 [https://academic.oup.com/jid/article/208/suppl\\_1/S23/831706](https://academic.oup.com/jid/article/208/suppl_1/S23/831706)
- 317 17. Global Taskforce on Cholera Control. Cholera Outbreak Response: Cholera Outbreak  
318 Response Field Manual [Internet]. 2020 [cited 2022 Aug 21]. Available from:  
319 <https://choleraoutbreak.org/book-page/cholera-outbreak-response>
- 320 18. Jahan S. Cholera – Epidemiology, Prevention and Control. In: Significance, Prevention  
321 and Control of Food Related Diseases [Internet]. InTech; 2016 [cited 2018 Dec 30].  
322 Available from: [http://www.intechopen.com/books/significance-prevention-and-control-](http://www.intechopen.com/books/significance-prevention-and-control-of-food-related-diseases/cholera-epidemiology-prevention-and-control)  
323 [of-food-related-diseases/cholera-epidemiology-prevention-and-control](http://www.intechopen.com/books/significance-prevention-and-control-of-food-related-diseases/cholera-epidemiology-prevention-and-control)
- 324 19. Pavanello S, Elhawary S, Pantuliano S, Team R, Abdi A, Bashir A, et al. Hidden and  
325 exposed: Urban refugees in Nairobi, Kenya. 2010.
- 326 20. Breiman RF, Shultz A, Omollo JO, Burke H, Qassim M, Ochieng JB, et al. Cholera  
327 outbreak in kenyan refugee camp: Risk factors for illness and importance of sanitation.  
328 *Am J Trop Med Hyg.* 2009;80(4):640–5.
- 329 21. Ali M, Nelson AR, Lopez AL, Sack DA. Updated Global Burden of Cholera in Endemic  
330 Countries. Remais J V., editor. *PLoS Negl Trop Dis* [Internet]. 2015 Jun 4 [cited 2019  
331 Jan 25];9(6):e0003832. Available from: <https://dx.plos.org/10.1371/journal.pntd.0003832>
- 332 22. Hassan UM, Mohammed YA. Binary Logistic Regression Analysis of the Determinants  
333 of Survival of Cholera Patients. *IOSR J Math.* 2020;16(1):26–31.
- 334 23. Ateudjieu J, Ram M, Sack DA, Djouma FN, Debes AK. Factors Associated with Fatal  
335 Outcomes Following Cholera-Like Syndrome in Far North Region of Cameroon: A

- 336 Community-Based Survey. *Am J Trop Med Hyg* [Internet]. 2016 Dec 7 [cited 2018 Dec  
337 30];95(6):1287–91. Available from:  
338 <http://www.ajtmh.org/content/journals/10.4269/ajtmh.16-0300>
- 339 24. Rancourt N. Gender and Vulnerability to Cholera in Sierra Leone: Gender analysis of the  
340 2012 cholera outbreak and an assessment of Oxfam’s response [Internet]. 2013 [cited  
341 2019 Jan 25]. Available from: [www.oxfam.org](http://www.oxfam.org)
- 342 25. Archer BN, De Jong GM, Keddy KH, Smith AM. Excess female deaths among rural  
343 Bangladeshi children : an examination of cause - -- specific mortality and morbidity Risk  
344 factors and gender differentials for death among children hospitalized with diarrhoea in.  
345 *Commun Dis Surveill Bull Int J Epidemiol Bangladesh J Heal Popul Nutr Int J*  
346 *Epidemiol.* 2009;7(2):729–151.
- 347 26. Page A-L, Ciglenecki I, Jasmin ER, Desvignes L, Grandesso F, Polonsky J, et al.  
348 Geographic Distribution and Mortality Risk Factors during the Cholera Outbreak in a  
349 Rural Region of Haiti, 2010-2011. Ryan ET, editor. *PLoS Negl Trop Dis* [Internet]. 2015  
350 Mar 26 [cited 2019 Jan 25];9(3):e0003605. Available from:  
351 <https://dx.plos.org/10.1371/journal.pntd.0003605>
- 352 27. Colombara D V., Cowgill KD, Faruque ASG. Risk Factors for Severe Cholera among  
353 Children under Five in Rural and Urban Bangladesh, 2000–2008: A Hospital-Based  
354 Surveillance Study. Kirk M, editor. *PLoS One* [Internet]. 2013 Jan 18 [cited 2019 Jan  
355 25];8(1):e54395. Available from: <http://dx.plos.org/10.1371/journal.pone.0054395>
- 356 28. Abdullah NN, Mohd Arsat MH, Aziz NRA, Al-Kubaisy W. Men Health Seeking  
357 Behaviour: A literature review. *Environ Proc J* [Internet]. 2022;7(20):247–54. Available  
358 from: <http://dx.doi.org/10.21834/ebpj.v7i20.3484>

- 359 29. Sule IB, Yahaya M, Aisha AA, Zainab AD, Ummulkhulthum B, Nguku P. Descriptive  
360 epidemiology of a cholera outbreak in Kaduna state, northwest Nigeria, 2014. *Pan Afr*  
361 *Med J*. 2017;27:1–8.
- 362 30. Bwire G, Malimbo M, Maskery B, Kim YE, Mogasale V, Levin A. The Burden of  
363 Cholera in Uganda. Ryan ET, editor. *PLoS Negl Trop Dis* [Internet]. 2013 Dec 5 [cited  
364 2019 Jan 25];7(12):e2545. Available from:  
365 <https://dx.plos.org/10.1371/journal.pntd.0002545>
- 366 31. Bwire G, Malimbo M, Makumbi I, Kagirita A, Wamala JF, Kalyebi P, et al. Cholera  
367 Surveillance in Uganda: An Analysis of Notifications for the Years 2007–2011. *J Infect*  
368 *Dis* [Internet]. 2013 Nov 1 [cited 2018 Dec 30];208(suppl\_1):S78–85. Available from:  
369 <https://academic.oup.com/jid/article-lookup/doi/10.1093/infdis/jit203>
- 370 32. Cowman G, Otipo S, Njeru I, Achia T, Thirumurthy H, Bartram J, et al. Factors  
371 associated with cholera in Kenya, 2008-2013. *Pan Afr Med J*. 2017;28:2008–13.
- 372 33. Mwenda V, Niyomwungere A, Oyugi E, Githuku J, Obonyo M, Gura Z. Cholera  
373 outbreak during a scientific conference at a Nairobi hotel, Kenya 2017. *J Public Health*  
374 *(Oxf)* [Internet]. 2021 Jun 7 [cited 2022 Aug 22];43(2):e140–4. Available from:  
375 <https://pubmed.ncbi.nlm.nih.gov/31322662/>
- 376 34. Dunkle SE, Mba-Jonas A, Loharikar A, Fouché B, Peck M, Ayers T, et al. Epidemic  
377 cholera in a crowded urban environment, Port-au-Prince, Haiti. *Emerg Infect Dis*  
378 [Internet]. 2011 Nov [cited 2019 Feb 5];17(11):2143–6. Available from:  
379 <http://www.ncbi.nlm.nih.gov/pubmed/22099120>
- 380 35. Nsagha DS, Atashili J, Fon PN, Tanue EA, Ayima CW, Kibu OD. Assessing the risk  
381 factors of cholera epidemic in the Buea Health District of Cameroon. *BMC Public Health*

- 382 [Internet]. 2015 Dec 14 [cited 2018 Dec 30];15(1):1128. Available from:  
383 <http://www.biomedcentral.com/1471-2458/15/1128>
- 384 36. Mutonga D, Langat D, Mwangi D, Tonui J, Njeru M, Abade A, et al. National  
385 Surveillance Data on the Epidemiology of Cholera in Kenya, 1997–2010. *J Infect Dis*  
386 [Internet]. 2013 Nov 1 [cited 2019 Oct 17];208(suppl\_1):S55–61. Available from:  
387 <https://academic.oup.com/jid/article-lookup/doi/10.1093/infdis/jit201>
- 388 37. Rourke MJA. Seasonal Prediction of African Rainfall With a Focus on Kenya [Internet].  
389 University College London; 2011 [cited 2019 Feb 5]. Available from:  
390 <http://discovery.ucl.ac.uk/1302403/1/1302403.pdf>
- 391 38. Rebaudet S, Sudre B, Faucher B, Piarroux R. Cholera in Coastal Africa: A Systematic  
392 Review of Its Heterogeneous Environmental Determinants. *J Infect Dis* [Internet]. 2013  
393 Nov 1 [cited 2019 Feb 5];208(suppl\_1):S98–106. Available from:  
394 <https://academic.oup.com/jid/article-lookup/doi/10.1093/infdis/jit202>
- 395 39. Das B. 1113. Real-Time Evolution of Extensively Drug-Resistant *Vibrio cholerae*. *Open*  
396 *Forum Infect Dis* [Internet]. 2018 Nov 26 [cited 2019 Feb 5];5(suppl\_1):S334–6.  
397 Available from: [https://academic.oup.com/ofid/article/5/suppl\\_1/S334/5207087](https://academic.oup.com/ofid/article/5/suppl_1/S334/5207087)
- 398 40. Gupta P, Mankere B, Chekkoora Keloth S, Tuteja U, Pandey P, Chelvam KT. Increased  
399 antibiotic resistance exhibited by the biofilm of *Vibrio cholerae* O139. *J Antimicrob*  
400 *Chemother* [Internet]. 2018 Jul 1 [cited 2019 Feb 5];73(7):1841–7. Available from:  
401 <https://academic.oup.com/jac/article/73/7/1841/4984488>
- 402
